# Supplementary material for: Increased movement-related signals in both basal ganglia and cerebellar output pathways in two children with dystonia
Source: Frontiers journal article supplement (doi:10.3389/fneur.2022.989340), 2022-09-09
Supplement: Data_Sheet_1.PDF [file Data_Sheet_1.PDF]

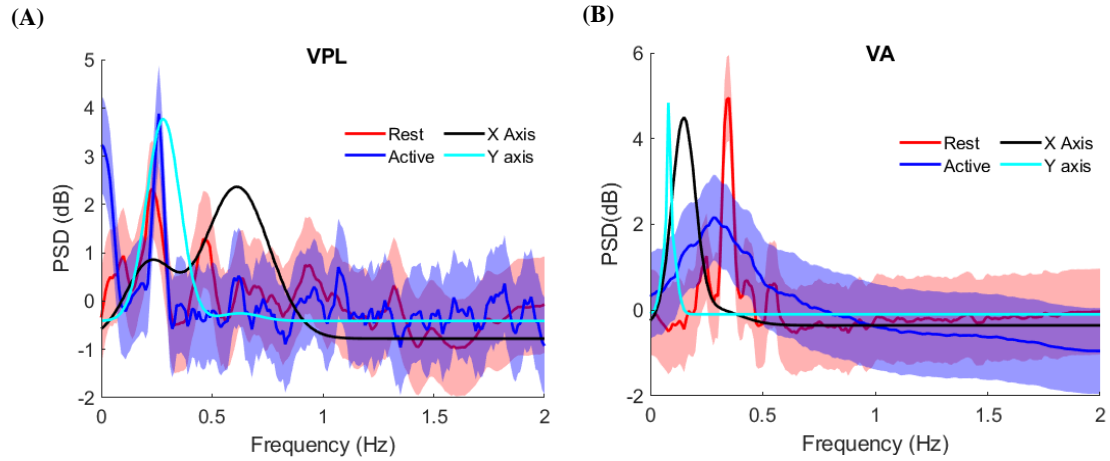

**Figure S1.** Task frequency components for the patient with (A) hemidystonia and (B) generalized dystonia. Contralateral brain signals during the figure-eight drawing task, recorded from (A) ventral posterolateral and (B) ventral anterior thalamus subnuclei. Power spectrum density (PSD) for kinematic data is shown for comparison:  $f_y$  component (cyan) and  $f_x$  component (black). Grand average and standard deviation across all microwire electrode recordings during all repetitions of the figure-eight drawing (blue) and resting (red) conditions. Vertical axis: power spectra (dB). Horizontal axis: frequency (Hz). VPL did not show significant correlations with task execution ( $p < 0.7$ ,  $p < 0.001$ ). VA did not show correlations with the task frequency components ( $p < 0.7$ ,  $p < 0.001$ ), according to the Spearman' correlations.
